# Supplementary material
Source: MDPI journal article supplement (https://www.mdpi.com/2227-9717/10/5/861)
Supplement: s1 [file s1]

Archive with 2 entries (2 files):
- S1 theoretical background_25.04.22_FP_CMO_new lit.pdf
- S2_Table 2_12.04.22 FP.pdf
