# Supplementary material
Source: MDPI journal article supplement (https://www.mdpi.com/2227-9717/10/5/861)
Supplement: s1 [file s1 › S2_Table 2_12.04.22 FP.pdf]

# Large-Scale Production of Size-Adjusted $\beta$ -Cell Spheroids in a Fully Controlled Stirred-Tank Reactor

Florian Petry and Denise Salzig \*

Institute of Bioprocess Engineering and Pharmaceutical Technology, University of Applied Sciences Mittelhessen, Wiesenstrasse 14, 35390 Giessen, Germany; [florian.petry@lse.thm.de](mailto:florian.petry@lse.thm.de)

\* Correspondence: [denise.salzig@lse.thm.de](mailto:denise.salzig@lse.thm.de); Tel.: +49-641-309-2630; Fax: +49-641-309-2553

**Table S1.** Summary of stirrer properties and the resulting bioreactor geometry including the ratios for swept volume  $V_S$  and working volume  $V_L$ , stirrer height  $h_s$  and stirrer diameter  $d_s$  or tank diameter  $D_T$ , as well as the bottom clearance  $C_B = h_{s,bottom}/d_s$  ( $h_{s,bottom}$  = installation height of stirrer from the bottom).

| Stirrer type           | 30°-3-SPB                                                                          | 45°-3-SPB                                                                           | Rushton                                                                              |
|------------------------|------------------------------------------------------------------------------------|-------------------------------------------------------------------------------------|--------------------------------------------------------------------------------------|
| Image                  | 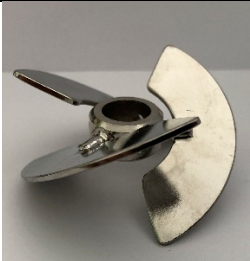 | 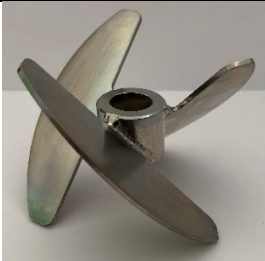 | 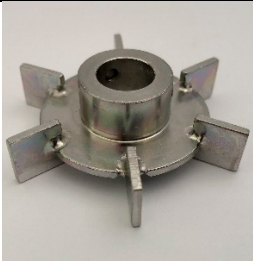 |
| Number of blades [-]   | 3                                                                                  | 3                                                                                   | 6                                                                                    |
| Blade angle [°]        | 30                                                                                 | 45                                                                                  | 90                                                                                   |
| Diameter $d_s$ [m]     | 0.065                                                                              | 0.065                                                                               | 0.054                                                                                |
| Height $h_s$ [m]       | 0.035                                                                              | 0.052                                                                               | 0.011                                                                                |
| Flow pattern           | axial (down)                                                                       | axial/radial (down)                                                                 | radial                                                                               |
| Power number $N_P$ [-] | 1.1                                                                                | 2.4                                                                                 | 4.0                                                                                  |
| $V_S/V_L$ [-]:         | 0.11                                                                               | 0.17                                                                                | 0.03                                                                                 |
| $h_s/d_s$ [-]:         | 0.5                                                                                | 0.8                                                                                 | 0.2                                                                                  |
| $d_s/D_T$ [-]:         | 0.6                                                                                | 0.6                                                                                 | 0.5                                                                                  |
| $C_B$ [-]:             | 0.7                                                                                | 0.7                                                                                 | 0.8                                                                                  |
